# Supplementary material
Source: PubMed Central journal article supplement (PMC4712948)
Supplement: NIHMS311328-supplement-01.pdf [file NIHMS311328-supplement-01.pdf]

## Supplemental Online Materials:

Table 1

Correlations ( $r$ ) for Dependent Measures in Experiment 1.

|         | Height<br>$r$ | Size<br>$r$ | AQ<br>$R$ | Anxiety<br>$r$ | Injury<br>$r$ |
|---------|---------------|-------------|-----------|----------------|---------------|
| Height  | ---           | 0.62**      | 0.37      | 0.31           | -0.09         |
| Size    |               | ---         | 0.15      | 0.13           | -0.12         |
| AQ      |               |             | ---       | 0.83**         | 0.11          |
| Anxiety |               |             |           | ---            | -0.06         |
| Injury  |               |             |           |                | ---           |

Note: \* =  $p < .05$ , \*\* =  $p < .01$ 

Table 2

Correlations ( $r$ ) for Dependent Measures in Experiment 3.

|              | Height<br>$r$ | Size<br>$r$ | AQ<br>$r$ | Self<br>Arousal<br>$r$ | Happy<br>$r$ | Anxiety<br>$r$ | Injury<br>$r$ |
|--------------|---------------|-------------|-----------|------------------------|--------------|----------------|---------------|
| Height       | ---           | 0.06        | 0.11      | 0.24*                  | -.05         | -.12           | .07           |
| Size         |               | ---         | .23*      | .05                    | .13          | -.19           | .02           |
| AQ           |               |             | ---       | .20                    | -.17         | .48**          | .13           |
| Self Arousal |               |             |           | ---                    | -.15         | .04            | -.13          |
| Happy        |               |             |           |                        | ---          | -.38**         | -.07          |
| Anxiety      |               |             |           |                        |              | ---            | .07           |

Note: \* =  $p < .05$ , \*\* =  $p < .01$

Table 3

Correlations (*r*) for Dependent Measures in Experiment 4.

|             | Height<br><i>r</i> | Size<br><i>r</i> | AQ<br><i>r</i> | Reappraisal<br><i>r</i> | Suppress<br><i>r</i> | Anxiety<br><i>r</i> | Injury<br><i>r</i> |
|-------------|--------------------|------------------|----------------|-------------------------|----------------------|---------------------|--------------------|
| Height      | ---                | .35*             | .05            | -.11                    | -.04                 | .15                 | -.10               |
| Size        |                    | ---              | .07            | -.21                    | .009                 | .13                 | .09                |
| AQ          |                    |                  | ---            | -.04                    | .14                  | .38*                | .23                |
| Reappraisal |                    |                  |                | ---                     | -.03                 | -.35*               | -.17               |
| Suppress    |                    |                  |                |                         | ---                  | .18                 | .32*               |
| Anxiety     |                    |                  |                |                         |                      | ---                 | .33*               |
| Injury      |                    |                  |                |                         |                      |                     | ---                |

---

Note: \* =  $p < .05$ , \*\* =  $p < .01$
